# Supplementary material for: Microglia and neurons in the hippocampus of migratory sandpipers
Source: PubMed Central journal article supplement (PMC4678657; doi:10.1590/1414-431x20155005), 2015-11-17
Supplement: 1414-431X-bjmbr-1414-431X20155005-supp5005.pdf [file 1414-431X-bjmbr-1414-431X20155005-supp5005.pdf]

## Supplementary Material

**Table S1.** Stereological results for *Calidris pusilla* NeuN-immunolabeled cells in the left hippocampal formation.

|                                  | N         | Thickness | CE    | Volume (mm <sup>3</sup> ) |
|----------------------------------|-----------|-----------|-------|---------------------------|
| <i>C. pusilla</i> 01             | 723,297   | 17.7      | 0.040 | 3.869                     |
| <i>C. pusilla</i> 02             | 1,040,384 | 19.3      | 0.042 | 3.794                     |
| <i>C. pusilla</i> 03             | 982,961   | 18.3      | 0.037 | 4.730                     |
| <i>C. pusilla</i> 04             | 891,518   | 18.1      | 0.041 | 2.790                     |
| Mean                             | 909,540   | 18.35     | 0.040 | 3.796                     |
| SD                               | 138,470   | 0.681     |       | 0.794                     |
| CV <sup>2</sup>                  | 0.023     |           |       |                           |
| CE <sup>2</sup>                  | 0.000075  |           |       |                           |
| CE <sup>2</sup> /CV <sup>2</sup> | 0.0231    |           |       |                           |
| CE <sup>2</sup> -CV <sup>2</sup> | -99.676   |           |       |                           |
| CVB <sup>2</sup> (%)             | -99.985   |           |       |                           |

$CVB^2 = CV^2 - CE^2$  (CE: Schaeffer coefficient of error; CV: coefficient of variation; CVB: biological variation coefficient). The negative value indicates CE is smaller than CV. The stereological parameters are: A(frame) = 50 × 50 μm, A(x,y step) = 350 × 350 μm; area sampling fraction = 0.02; and section sampling fraction = 0.2.

**Table S2.** Stereological results for *Actitis macularia* NeuN-immunolabeled cells in the left hippocampal formation.

|                                  | N       | Thickness | CE    | Volume (mm <sup>3</sup> ) |
|----------------------------------|---------|-----------|-------|---------------------------|
| Am 07 HE                         | 778,022 | 17,400    | 0.040 | 5.294                     |
| Am 08 HE                         | 831,024 | 17,100    | 0.040 | 7.582                     |
| Am 09 HE                         | 837,535 | 15,800    | 0.042 | 6.752                     |
| Am 13 HE                         | 612,484 | 19,500    | 0.045 | 4.953                     |
| Mean                             | 764,766 | 17,450    | 0.042 | 6.145                     |
| SD                               | 104,962 | 1,533     |       | 1.235                     |
| CV <sup>2</sup>                  | 0.019   |           |       |                           |
| CE <sup>2</sup>                  | 0.002   |           |       |                           |
| CE <sup>2</sup> /CV <sup>2</sup> | 0.094   |           |       |                           |
| CE <sup>2</sup> -CV <sup>2</sup> | -0.017  |           |       |                           |
| CVB <sup>2</sup> (%)             | -90.640 |           |       |                           |

$CVB^2 = CV^2 - CE^2$  (CE: Schaeffer coefficient of error; CV: coefficient of variation; CVB: biological variation coefficient). The negative value indicates CE is smaller than CV. The stereological parameters are: A(frame) = 50×50 μm, A(x,y step) = 350×350 μm; area sampling fraction = 0.02; and section sampling fraction = 0.2.

**Table S3.** Stereological results for *Calidris pusilla* IBA-1-immunolabeled cells in the left hippocampal formation.

|                                  | N        | Thickness | CE    | Volume (mm <sup>3</sup> ) |
|----------------------------------|----------|-----------|-------|---------------------------|
| <i>C. pusilla</i> 01             | 43,937   | 16        | 0.045 | 3.074                     |
| <i>C. pusilla</i> 02             | 41,620   | 16.7      | 0.049 | 3.211                     |
| <i>C. pusilla</i> 03             | 60,749   | 36.2      | 0.071 | 4.687                     |
| <i>C. pusilla</i> 04             | 66,750   | 27.2      | 0.041 | 3.895                     |
| Mean                             | 53,263   | 24.025    | 0.051 | 3.717                     |
| SD                               | 12,389   | 9.598     |       | 0.740                     |
| CV <sup>2</sup>                  | 0.054    |           |       |                           |
| CE <sup>2</sup>                  | 0.002647 |           |       |                           |
| CE <sup>2</sup> /CV <sup>2</sup> | 0.0489   |           |       |                           |
| CE <sup>2</sup> -CV <sup>2</sup> | -0.051   |           |       |                           |
| CVB <sup>2</sup> (%)             | -95.108  |           |       |                           |

$CVB^2 = CV^2 - CE^2$  (CE: Schaeffer coefficient of error; CV: coefficient of variation; CVB: biological variation coefficient). The negative value indicates CE is smaller than CV. The stereological parameters are: A(frame) = 100 × 100 μm, A(x,y step) = 400 × 400 μm; area sampling fraction = 0.062; and section sampling fraction = 0.2.

**Table S4.** Stereological results for *Actitis macularia* IBA-1-immunolabeled cells in the left hippocampal formation.

|                                  | N       | Thickness | CE   | Volume (mm <sup>3</sup> ) |
|----------------------------------|---------|-----------|------|---------------------------|
| Am 05                            | 86,327  | 13.08     | 0.03 | 7.16                      |
| Am 07                            | 77,772  | 17.06     | 0.03 | 5.74                      |
| Am 09                            | 102,051 | 15.07     | 0.03 | 6.53                      |
| Am 11                            | 70,299  | 14.03     | 0.04 | 5.31                      |
| Mean                             | 84,112  | 14.81     | 0.03 | 6.18                      |
| SD                               | 13,634  | 0.004     |      | 0.82                      |
| CV <sup>2</sup>                  | 0.026   |           |      |                           |
| CE <sup>2</sup>                  | 0.0009  |           |      |                           |
| CE <sup>2</sup> /CV <sup>2</sup> | 0.034   |           |      |                           |
| CE <sup>2</sup> -CV <sup>2</sup> | -0.025  |           |      |                           |
| CVB <sup>2</sup> (%)             | -96.574 |           |      |                           |

$CVB^2 = -CE^2$  (CE: Schaeffer coefficient of error; CV: coefficient of variation; CVB: biological variation coefficient). The negative value indicates CE is smaller than CV. The stereological parameters are: A(frame) = 100 × 100 μm, A(x,y step) = 400 × 400 μm; area sampling fraction = 0.081; and section sampling fraction = 0.2.
